# Supplementary material for: Imiquimod Boosts Interferon Response, and Decreases ACE2 and Pro-Inflammatory Response of Human Bronchial Epithelium in Asthma
Source: PubMed Central journal article supplement (PMC8688760; doi:10.3389/fimmu.2021.743890), 2021-12-07
Supplement: DataSheet_1.pdf [file DataSheet_1.pdf]

**TITLE: Imiquimod increases interferon response, and decreases ACE2 and pro-inflammatory response of human bronchial epithelium in asthma.**

Juan José Nieto-Fontarigo, PhD<sup>a†</sup>, Sofia Tillgren, MSc<sup>a†</sup>, Samuel Cerps, MSc<sup>a</sup>, Asger Sverrild, MD, PhD<sup>b</sup>, Morten Hvidtfeldt, MD, PhD<sup>b</sup>, Sangeetha Ramu, MSc<sup>a</sup>, Mandy Menzel, PhD<sup>a</sup>, Adam Frederik Sander, PhD<sup>c,d</sup>, Celeste Porsbjerg, MD, PhD<sup>b</sup> and Lena Uller, PhD<sup>a\*</sup>

a. Department of Experimental Medical Science, BMC D12, Lund University, Sweden

b. Department of Respiratory Medicine, University Hospital Bispebjerg, Copenhagen, Denmark

c. Department for Immunology and Microbiology, Faculty of Health and Medical Sciences, Centre for Medical Parasitology, University of Copenhagen, Denmark

d. Department of Infectious Disease, Copenhagen University Hospital, Denmark

†These authors have contributed equally to this work and share first authorship

## SUPPLEMENTARY TABLES

| <b>Supplementary Table 1. List of primers used in qPCR assays.</b> |                 |                                                                             |
|--------------------------------------------------------------------|-----------------|-----------------------------------------------------------------------------|
| <b>Primer</b>                                                      | <b>Provider</b> | <b>Cat. No or sequence</b>                                                  |
| <b>ACE2</b>                                                        | Qiagen          | #PPH02572A-200                                                              |
| <b>CCL-5</b>                                                       | Primer Design   | Sense: -AACCCAGCAGTCGTCTTTGTC-<br>Anti-sense: -AGCAAGCAGAAACAGGCAAAT-       |
| <b>GAPDH</b>                                                       | Qiagen          | #PPH00150F-200                                                              |
| <b>IFN-<math>\beta</math></b>                                      | Qiagen          | #PPH00384F-200                                                              |
| <b>IL-1<math>\beta</math></b>                                      | Qiagen          | #PPH00171C-200                                                              |
| <b>IL-33</b>                                                       | Primer Design   | Sense: -AAAGAAAGATAAGGTGTTACTGAGTTA-<br>Anti-sense: -GCAACCAGAAGTCTTTGTAGG- |
| <b>MDA5</b>                                                        | Qiagen          | #PPH18927A-200                                                              |
| <b>RIG-I</b>                                                       | Qiagen          | #PPH20774A-200                                                              |
| <b>TLR3</b>                                                        | Qiagen          | #PPH01803E-200                                                              |
| <b>TMPRSS2</b>                                                     | Qiagen          | #PPH02262C-200                                                              |
| <b>TNF-<math>\alpha</math></b>                                     | Primer Design   | Sense: -AGGTTCTCTCCTCTCACATAC-<br>Anti-sense: -ATCATGCTTTCAGTGCTCATG-       |

**Supplementary Table 2. Differentially expressed proteins in imiquimod treated HBECs compared with unstimulated cells.**

| Proteins | Log2 Fold-Change | SE of difference | P value  | t ratio | df |
|----------|------------------|------------------|----------|---------|----|
| SNRPE    | -6,56171         | 0,89168          | 0,005187 | 7,35881 | 3  |
| SRSF3    | -6,21941         | 0,382767         | 0,003766 | 16,2486 | 2  |
| HIST1H1D | -5,04973         | 1,19302          | 0,02413  | 4,23273 | 3  |
| LSM3     | -4,99512         | 1,49896          | 0,04464  | 3,33239 | 3  |
| LRRC47   | -4,58984         | 1,03937          | 0,047644 | 4,416   | 2  |
| KPNA2    | -3,9309          | 0,815816         | 0,008533 | 4,81837 | 4  |
| UNC45A   | -3,92184         | 0,995889         | 0,029174 | 3,93803 | 3  |
| DDB1     | -3,91515         | 0,672336         | 0,028247 | 5,82321 | 2  |
| MYO1E    | -3,85071         | 0,889308         | 0,049416 | 4,33001 | 2  |
| RPLP0    | -3,84009         | 0,622533         | 0,008576 | 6,16849 | 3  |
| FAU      | -3,82132         | 1,11485          | 0,041609 | 3,42765 | 3  |
| PDLIM5   | -3,81022         | 0,760234         | 0,015292 | 5,0119  | 3  |
| PPP2R2A  | -3,80562         | 0,826075         | 0,019235 | 4,60687 | 3  |
| RPS16    | -3,7158          | 1,0621           | 0,024929 | 3,49854 | 4  |
| SERPINH1 | -3,58003         | 0,62466          | 0,010546 | 5,73117 | 3  |
| IARS     | -3,56413         | 0,406114         | 0,003116 | 8,77618 | 3  |
| GLOD4    | -3,52306         | 0,744378         | 0,017879 | 4,73289 | 3  |
| POLR1C   | -3,43976         | 0,53216          | 0,023108 | 6,46378 | 2  |
| PC       | -3,33423         | 0,184187         | 0,003038 | 18,1024 | 2  |
| H2AFY    | -3,32857         | 1,17777          | 0,04753  | 2,82615 | 4  |
| KYAT3    | -3,29688         | 0,394455         | 0,003591 | 8,35806 | 3  |
| NME2     | -3,20386         | 0,901682         | 0,02373  | 3,55321 | 4  |
| PPM1G    | -3,08191         | 0,813783         | 0,032286 | 3,78714 | 3  |
| OLA1     | -3,04894         | 0,6011           | 0,007119 | 5,07226 | 4  |
| ALDH2    | -2,92441         | 0,387685         | 0,00483  | 7,54328 | 3  |
| SART1    | -2,91746         | 0,837691         | 0,039976 | 3,48274 | 3  |
| RPS15    | -2,91108         | 0,310919         | 0,00258  | 9,36281 | 3  |
| SSRP1    | -2,86601         | 0,48037          | 0,009421 | 5,96625 | 3  |
| PARP9    | -2,80669         | 0,270853         | 0,009185 | 10,3624 | 2  |
| HADHA    | -2,7977          | 0,844861         | 0,029615 | 3,31144 | 4  |
| EPHA2    | -2,79283         | 0,40058          | 0,006055 | 6,97197 | 3  |
| PRDX4    | -2,74692         | 0,500466         | 0,031627 | 5,48873 | 2  |
| MRPL12   | -2,74321         | 0,690695         | 0,028534 | 3,97167 | 3  |
| DYNLRB1  | -2,72754         | 0,693046         | 0,029222 | 3,93558 | 3  |
| FGFBP1   | -2,68276         | 0,603694         | 0,0113   | 4,44391 | 4  |
| RABGGTB  | -2,652           | 0,342202         | 0,016246 | 7,74981 | 2  |

|                |          |           |          |         |   |
|----------------|----------|-----------|----------|---------|---|
| <b>EHP1L1</b>  | -2,55026 | 0,725696  | 0,039079 | 3,51423 | 3 |
| <b>ACTR1A</b>  | -2,50933 | 0,468417  | 0,012727 | 5,35704 | 3 |
| <b>CSTB</b>    | -2,48053 | 0,377541  | 0,002777 | 6,57021 | 4 |
| <b>PARK7</b>   | -2,474   | 0,53713   | 0,009986 | 4,60596 | 4 |
| <b>BAG6</b>    | -2,45961 | 0,48795   | 0,037176 | 5,04069 | 2 |
| <b>PYGB</b>    | -2,45741 | 0,540879  | 0,01047  | 4,54337 | 4 |
| <b>AK1</b>     | -2,37158 | 0,274356  | 0,01312  | 8,64419 | 2 |
| <b>ACO2</b>    | -2,36188 | 0,319264  | 0,005108 | 7,3979  | 3 |
| <b>DNM1L</b>   | -2,34205 | 0,795705  | 0,042247 | 2,94337 | 4 |
| <b>SRPK1</b>   | -2,32568 | 0,526564  | 0,04763  | 4,41672 | 2 |
| <b>ARPC1B</b>  | -2,29883 | 0,342638  | 0,006757 | 6,70923 | 3 |
| <b>GOT2</b>    | -2,1734  | 0,307206  | 0,002107 | 7,07473 | 4 |
| <b>FUBP1</b>   | -2,1709  | 0,444056  | 0,008109 | 4,88881 | 4 |
| <b>MTCH2</b>   | -2,11918 | 0,388677  | 0,032031 | 5,45229 | 2 |
| <b>PPAT</b>    | -2,06297 | 0,217776  | 0,010961 | 9,4729  | 2 |
| <b>CKAP5</b>   | -2,03639 | 0,58553   | 0,025401 | 3,47786 | 4 |
| <b>TUBB6</b>   | -2,01976 | 0,264456  | 0,004661 | 7,63741 | 3 |
| <b>PCYT1A</b>  | -1,99888 | 0,555935  | 0,022849 | 3,59553 | 4 |
| <b>ATP5F1C</b> | -1,96519 | 0,58294   | 0,043373 | 3,37117 | 3 |
| <b>PARP4</b>   | -1,95957 | 0,152864  | 0,00603  | 12,8191 | 2 |
| <b>SSB</b>     | -1,95447 | 0,57453   | 0,027231 | 3,40186 | 4 |
| <b>CTSZ</b>    | -1,88564 | 0,450758  | 0,024894 | 4,18327 | 3 |
| <b>DNAJB1</b>  | -1,8711  | 0,659607  | 0,047025 | 2,83669 | 4 |
| <b>LRPPRC</b>  | -1,85979 | 0,439302  | 0,013332 | 4,23352 | 4 |
| <b>ANXA5</b>   | -1,81793 | 0,456096  | 0,016321 | 3,98585 | 4 |
| <b>CHMP4A</b>  | -1,80368 | 0,244101  | 0,001789 | 7,38909 | 4 |
| <b>STK26</b>   | -1,79284 | 0,51221   | 0,039475 | 3,5002  | 3 |
| <b>AKR1D1</b>  | -1,7871  | 0,207206  | 0,013178 | 8,62474 | 2 |
| <b>IRGQ</b>    | -1,76979 | 0,554029  | 0,049544 | 3,19441 | 3 |
| <b>BUB3</b>    | -1,74554 | 0,177051  | 0,010132 | 9,85898 | 2 |
| <b>TCOF1</b>   | -1,74135 | 0,402874  | 0,012425 | 4,32232 | 4 |
| <b>PRDX1</b>   | -1,7398  | 0,559818  | 0,035949 | 3,10779 | 4 |
| <b>CTSD</b>    | -1,70007 | 0,595924  | 0,046264 | 2,85282 | 4 |
| <b>YME1L1</b>  | -1,69816 | 0,0536669 | 0,000997 | 31,6427 | 2 |
| <b>CCT5</b>    | -1,68679 | 0,601648  | 0,048632 | 2,80361 | 4 |
| <b>TUBG2</b>   | -1,66527 | 0,471709  | 0,038631 | 3,5303  | 3 |
| <b>RAB8A</b>   | -1,6408  | 0,450583  | 0,035704 | 3,64151 | 3 |
| <b>TES</b>     | -1,58368 | 0,400785  | 0,028917 | 3,95144 | 3 |
| <b>MAGOHB</b>  | -1,56455 | 0,244117  | 0,023491 | 6,409   | 2 |
| <b>PCBP1</b>   | -1,49743 | 0,330137  | 0,010531 | 4,53578 | 4 |
| <b>COL17A1</b> | -1,48815 | 0,465558  | 0,033011 | 3,19649 | 4 |
| <b>EIF4G1</b>  | -1,44462 | 0,432599  | 0,028852 | 3,33939 | 4 |

|         |           |            |          |         |   |
|---------|-----------|------------|----------|---------|---|
| CCT2    | -1,42648  | 0,443983   | 0,032499 | 3,21291 | 4 |
| RPL7    | -1,40494  | 0,441398   | 0,033441 | 3,18293 | 4 |
| STRN4   | -1,38507  | 0,00536675 | 0,000015 | 258,083 | 2 |
| CHMP2A  | -1,38029  | 0,458552   | 0,039546 | 3,01012 | 4 |
| TSTA3   | -1,3568   | 0,29575    | 0,019453 | 4,58765 | 3 |
| RPSA    | -1,35606  | 0,481385   | 0,047974 | 2,817   | 4 |
| UGDH    | -1,3109   | 0,265262   | 0,007806 | 4,94188 | 4 |
| NCL     | -1,29884  | 0,465118   | 0,049187 | 2,79249 | 4 |
| H1FX    | -1,28915  | 0,34366    | 0,033088 | 3,75125 | 3 |
| ZPR1    | -1,28088  | 0,145179   | 0,012604 | 8,82276 | 2 |
| RPL15   | -1,27365  | 0,371481   | 0,041582 | 3,42857 | 3 |
| AARS    | -1,27151  | 0,434016   | 0,042829 | 2,92964 | 4 |
| RPL35   | -1,22423  | 0,356583   | 0,026457 | 3,43323 | 4 |
| PMPCB   | -1,20445  | 0,0837988  | 0,004806 | 14,3731 | 2 |
| ZC3H18  | -1,19632  | 0,342199   | 0,039596 | 3,49597 | 3 |
| CCT3    | -1,18026  | 0,363484   | 0,031463 | 3,24706 | 4 |
| S100A14 | -1,17765  | 0,379394   | 0,03608  | 3,10403 | 4 |
| LUC7L2  | -1,1344   | 0,32618    | 0,040118 | 3,47782 | 3 |
| TAGLN2  | -1,11943  | 0,136366   | 0,0012   | 8,20901 | 4 |
| MTHFD1  | -1,09515  | 0,31604    | 0,025695 | 3,46523 | 4 |
| NCEH1   | -1,06112  | 0,0488548  | 0,002113 | 21,72   | 2 |
| CAPRIN1 | -0,995311 | 0,140708   | 0,019406 | 7,07358 | 2 |
| HNRNPK  | -0,979516 | 0,289114   | 0,027581 | 3,38799 | 4 |
| PTMA    | -0,97186  | 0,335491   | 0,044259 | 2,89682 | 4 |
| ANXA1   | -0,961044 | 0,344685   | 0,049404 | 2,78818 | 4 |
| EHD1    | -0,861052 | 0,242568   | 0,038098 | 3,54973 | 3 |
| PCBP2   | -0,839867 | 0,300174   | 0,048914 | 2,79794 | 4 |
| RPS4X   | -0,7765   | 0,259901   | 0,040431 | 2,98768 | 4 |
| HSPB1   | -0,755001 | 0,240647   | 0,034936 | 3,13738 | 4 |
| EZR     | -0,719886 | 0,23859    | 0,039269 | 3,01725 | 4 |
| NOLC1   | -0,692483 | 0,173517   | 0,016253 | 3,99087 | 4 |
| APEX1   | -0,673531 | 0,227833   | 0,041709 | 2,95625 | 4 |
| NUP93   | -0,59549  | 0,136017   | 0,011893 | 4,37806 | 4 |
| GOLGA3  | -0,566146 | 0,113512   | 0,037928 | 4,98754 | 2 |
| KPNA1   | -0,540556 | 0,0812648  | 0,021862 | 6,65178 | 2 |
| SFN     | -0,52892  | 0,182967   | 0,044528 | 2,89079 | 4 |
| PAPOLA  | 0,190326  | 0,0360134  | 0,033989 | 5,28487 | 2 |
| ITGA3   | 0,301182  | 0,0592206  | 0,01469  | 5,08577 | 3 |
| ASPH    | 0,628595  | 0,207584   | 0,038851 | 3,02815 | 4 |
| MTHFS   | 0,719578  | 0,11672    | 0,025316 | 6,16498 | 2 |
| KIF2A   | 0,773129  | 0,277441   | 0,049482 | 2,78664 | 4 |
| LSM12   | 0,889807  | 0,204151   | 0,048817 | 4,35858 | 2 |

|                |          |           |          |         |   |
|----------------|----------|-----------|----------|---------|---|
| <b>ESYT2</b>   | 0,997048 | 0,14355   | 0,006121 | 6,94567 | 3 |
| <b>MAPK3</b>   | 1,03331  | 0,27319   | 0,032391 | 3,78238 | 3 |
| <b>LPCAT1</b>  | 1,08621  | 0,0139707 | 0,000165 | 77,7491 | 2 |
| <b>GNG12</b>   | 1,10427  | 0,276352  | 0,016185 | 3,99588 | 4 |
| <b>FAM120A</b> | 1,19085  | 0,287768  | 0,025616 | 4,13823 | 3 |
| <b>OXR1</b>    | 1,33251  | 0,448985  | 0,041233 | 2,96782 | 4 |
| <b>CUL4B</b>   | 1,34495  | 0,382956  | 0,039141 | 3,51202 | 3 |
| <b>SDC4</b>    | 1,48367  | 0,28102   | 0,013251 | 5,27959 | 3 |
| <b>BLMH</b>    | 1,67269  | 0,0776476 | 0,002148 | 21,5421 | 2 |
| <b>PRRC2A</b>  | 2,55132  | 0,455423  | 0,030418 | 5,60208 | 2 |

**Supplementary Table 3. Reactome pathways overrepresented in imiquimod downmodulated proteins.**

| #term ID    | term description                                          | observed gene count | background gene count | strength | FDR    | matching proteins in your network                                                                           |
|-------------|-----------------------------------------------------------|---------------------|-----------------------|----------|--------|-------------------------------------------------------------------------------------------------------------|
| HSA-1430728 | Metabolism                                                | 19                  | 2032                  | 0.39     | 0.0296 | ACO2,PYGB,AKR1D1,GOT2,RPS16,CCBL2,LRPPRC,ALDH2,PPAT,PCYT1A,ATP5C1,PARP9,AK1,IARS,HADHA,PARP4,PC,RPLP0,RPS15 |
| HSA-2408522 | Selenoamino acid metabolism                               | 4                   | 112                   | 0.97     | 0.0296 | RPS16,IARS,RPLP0,RPS15                                                                                      |
| HSA-71291   | Metabolism of amino acids and derivatives                 | 6                   | 354                   | 0.65     | 0.0471 | GOT2,RPS16,CCBL2,IARS,RPLP0,RPS15                                                                           |
| HSA-2022377 | Metabolism of Angiotensinogen to Angiotensins             | 2                   | 17                    | 1.49     | 0.0471 | CTSZ,CTSD                                                                                                   |
| HSA-1852241 | Organelle biogenesis and maintenance                      | 7                   | 287                   | 0.8      | 0.0296 | CCT5,RAB8A,TUBB6,ATP5C1,DYNLRB1,ACTR1A,CKAP5                                                                |
| HSA-380320  | Recruitment of NuMA to mitotic centrosomes                | 4                   | 91                    | 1.06     | 0.0296 | TUBG2,TUBB6,ACTR1A,CKAP5                                                                                    |
| HSA-68877   | Mitotic Prometaphase                                      | 5                   | 190                   | 0.84     | 0.0296 | TUBG2,TUBB6,BUB3,ACTR1A,CKAP5                                                                               |
| HSA-69275   | G2/M Transition                                           | 6                   | 189                   | 0.92     | 0.0296 | TUBG2,RAB8A,TUBB6,PPP2R2A,ACTR1A,CKAP5                                                                      |
| HSA-68886   | M Phase                                                   | 6                   | 343                   | 0.66     | 0.0471 | TUBG2,TUBB6,PPP2R2A,BUB3,ACTR1A,CKAP5                                                                       |
| HSA-69278   | Cell Cycle, Mitotic                                       | 7                   | 483                   | 0.58     | 0.0471 | TUBG2,RAB8A,TUBB6,PPP2R2A,BUB3,ACTR1A,CKAP5                                                                 |
| HSA-75153   | Apoptotic execution phase                                 | 3                   | 51                    | 1.19     | 0.0296 | HIST1H1D,MST4,DNM1L                                                                                         |
| HSA-3371497 | HSP90 chaperone cycle for steroid hormone receptors (SHR) | 3                   | 53                    | 1.17     | 0.0297 | DNAJB1,TUBB6,ACTR1A                                                                                         |
| HSA-168254  | Influenza Infection                                       | 4                   | 148                   | 0.85     | 0.0471 | RPS16,KPNA2,RPLP0,RPS15                                                                                     |
| HSA-5663205 | Infectious disease                                        | 6                   | 363                   | 0.63     | 0.0471 | RPS16,SSRP1,CHMP4A,KPNA2,RPLP0,RPS15                                                                        |
| HSA-8953854 | Metabolism of RNA                                         | 9                   | 652                   | 0.56     | 0.0296 | RPS16,LSM3,SART1,MAGOHB,PPP2R2A,SRSF3,SNRPE,RPLP0,RPS15                                                     |

|                    |                                                                           |   |     |      |        |                                       |
|--------------------|---------------------------------------------------------------------------|---|-----|------|--------|---------------------------------------|
| <b>HSA-73856</b>   | RNA Polymerase II Transcription Termination                               | 3 | 65  | 1.08 | 0.0471 | MAGOHB,SRSF3,SNRPE                    |
| <b>HSA-975957</b>  | Nonsense Mediated Decay (NMD) enhanced by the Exon Junction Complex (EJC) | 5 | 112 | 1.07 | 0.0296 | RPS16,MAGOHB,PPP2R2A,RPLP0,RPS15      |
| <b>HSA-109688</b>  | Cleavage of Growing Transcript in the Termination Region                  | 3 | 65  | 1.08 | 0.0471 | MAGOHB,SRSF3,SNRPE                    |
| <b>HSA-72163</b>   | mRNA Splicing - Major Pathway                                             | 5 | 178 | 0.86 | 0.0296 | LSM3,SART1,MAGOHB,SRSF3,SNRPE         |
| <b>HSA-197264</b>  | Nicotinamide salvaging                                                    | 2 | 19  | 1.44 | 0.0471 | PARP9,PARP4                           |
| <b>HSA-5617833</b> | Cilium Assembly                                                           | 6 | 195 | 0.9  | 0.0296 | CCT5,RAB8A,TUBB6,DYNLRB1,ACTR1A,CKAP5 |



**Supplementary Table 4. Differentially expressed genes (p-value < 0.1) in poly(I:C) stimulated cells treated with imiquimod vs. poly(I:C) stimulated cells.**

| mRNA           | Log2 fold change | std error (log2) | Lower confidence limit (log2) | Upper confidence limit (log2) | P-value  | BY.p.value | probe.ID            |
|----------------|------------------|------------------|-------------------------------|-------------------------------|----------|------------|---------------------|
| <b>CTNNB1</b>  | 1.01             | 0.083            | 0.846                         | 1.17                          | 1.89e-05 | 0.0225     | NM_001098210.1:1815 |
| <b>BCAP31</b>  | 0.547            | 0.0484           | 0.453                         | 0.642                         | 2.84e-05 | 0.0225     | NM_005745.7:495     |
| <b>ITGA5</b>   | 1.46             | 0.143            | 1.18                          | 1.74                          | 5.13e-05 | 0.0262     | NM_002205.2:925     |
| <b>JAK1</b>    | 0.976            | 0.104            | 0.771                         | 1.18                          | 8.47e-05 | 0.0262     | NM_002227.1:285     |
| <b>PTAFR</b>   | 1.72             | 0.188            | 1.35                          | 2.09                          | 9.75e-05 | 0.0262     | NM_000952.3:1035    |
| <b>CD9</b>     | 1.21             | 0.134            | 0.949                         | 1.47                          | 0.000103 | 0.0262     | NM_001769.2:405     |
| <b>C1QBP</b>   | -0.831           | 0.0945           | -1.02                         | -0.645                        | 0.00012  | 0.0262     | NM_001212.3:745     |
| <b>CD82</b>    | 1.19             | 0.139            | 0.919                         | 1.46                          | 0.000137 | 0.0262     | NM_002231.3:1211    |
| <b>IKBKG</b>   | 1.02             | 0.124            | 0.773                         | 1.26                          | 0.000175 | 0.0262     | NM_003639.2:470     |
| <b>STAT2</b>   | 1.1              | 0.134            | 0.836                         | 1.36                          | 0.000179 | 0.0262     | NM_005419.2:1965    |
| <b>CDKN1A</b>  | 1.43             | 0.176            | 1.08                          | 1.77                          | 0.000189 | 0.0262     | NM_000389.2:1975    |
| <b>PTK2</b>    | 0.833            | 0.104            | 0.63                          | 1.04                          | 2E-04    | 0.0262     | NM_005607.3:1005    |
| <b>CD24</b>    | 1.19             | 0.151            | 0.897                         | 1.49                          | 0.000216 | 0.0262     | NM_013230.2:95      |
| <b>BCL3</b>    | 1.33             | 0.172            | 0.993                         | 1.67                          | 0.000247 | 0.0279     | NM_005178.2:450     |
| <b>TAPBP</b>   | 0.852            | 0.118            | 0.621                         | 1.08                          | 0.000356 | 0.0367     | NM_003190.4:1536    |
| <b>CD99</b>    | 0.701            | 0.0978           | 0.51                          | 0.893                         | 0.000371 | 0.0367     | NM_002414.3:625     |
| <b>TGFB1</b>   | 0.948            | 0.134            | 0.686                         | 1.21                          | 0.000394 | 0.0367     | NM_000660.3:1260    |
| <b>CD46</b>    | 0.992            | 0.143            | 0.712                         | 1.27                          | 0.000443 | 0.0389     | NM_172350.1:365     |
| <b>IGF2R</b>   | 1.08             | 0.158            | 0.772                         | 1.39                          | 0.00048  | 0.0399     | NM_000876.1:2605    |
| <b>NT5E</b>    | 1.06             | 0.157            | 0.752                         | 1.37                          | 0.000521 | 0.0411     | NM_002526.2:1214    |
| <b>IL6ST</b>   | 0.904            | 0.135            | 0.639                         | 1.17                          | 0.000545 | 0.0411     | NM_002184.2:2505    |
| <b>IRF1</b>    | 1.59             | 0.242            | 1.11                          | 2.06                          | 0.000605 | 0.0435     | NM_002198.1:510     |
| <b>SIGIRR</b>  | 1.64             | 0.254            | 1.15                          | 2.14                          | 0.000638 | 0.0439     | NM_021805.2:469     |
| <b>POU2F2</b>  | -1.39            | 0.218            | -1.82                         | -0.962                        | 0.000702 | 0.0449     | NM_002698.2:908     |
| <b>RUNX1</b>   | 1.1              | 0.172            | 0.757                         | 1.43                          | 0.00071  | 0.0449     | NM_001754.4:635     |
| <b>BCL10</b>   | 0.723            | 0.118            | 0.493                         | 0.954                         | 0.00085  | 0.0517     | NM_003921.2:1250    |
| <b>STAT6</b>   | 0.35             | 0.0578           | 0.236                         | 0.463                         | 0.000925 | 0.0529     | NM_003153.3:2030    |
| <b>ARG2</b>    | 1.07             | 0.177            | 0.72                          | 1.41                          | 0.000936 | 0.0529     | NM_001172.3:1150    |
| <b>PLAU</b>    | 1.09             | 0.184            | 0.725                         | 1.45                          | 0.00105  | 0.0573     | NM_002658.2:793     |
| <b>IL13RA1</b> | 0.853            | 0.146            | 0.567                         | 1.14                          | 0.00111  | 0.0574     | NM_001560.2:1230    |
| <b>TGFR1</b>   | 1.45             | 0.249            | 0.961                         | 1.94                          | 0.00113  | 0.0574     | NM_004612.2:4280    |
| <b>MYD88</b>   | 0.93             | 0.162            | 0.613                         | 1.25                          | 0.00121  | 0.0589     | NM_002468.3:2145    |

|                  |        |        |        |        |         |        |                     |
|------------------|--------|--------|--------|--------|---------|--------|---------------------|
| <b>NOTCH2</b>    | 0.87   | 0.152  | 0.571  | 1.17   | 0.00125 | 0.0589 | NM_024408.3:2842    |
| <b>MAPK1</b>     | 0.566  | 0.0994 | 0.371  | 0.761  | 0.00127 | 0.0589 | NM_138957.2:430     |
| <b>ICAM1</b>     | 2.02   | 0.362  | 1.31   | 2.73   | 0.00142 | 0.0641 | NM_000201.2:2253    |
| <b>ITGB1</b>     | 0.749  | 0.136  | 0.482  | 1.02   | 0.00151 | 0.0657 | NM_033666.2:2000    |
| <b>MCL1</b>      | 0.669  | 0.122  | 0.43   | 0.909  | 0.00154 | 0.0657 | NM_021960.3:1260    |
| <b>IRF5</b>      | 2.51   | 0.463  | 1.6    | 3.41   | 0.00165 | 0.0685 | NM_002200.3:1845    |
| <b>IFNAR1</b>    | 0.979  | 0.182  | 0.622  | 1.33   | 0.00169 | 0.0685 | NM_000629.2:3123    |
| <b>PTGS2</b>     | -1.13  | 0.212  | -1.55  | -0.717 | 0.00175 | 0.069  | NM_000963.1:495     |
| <b>CD3EAP</b>    | -2.03  | 0.381  | -2.77  | -1.28  | 0.00179 | 0.069  | NM_012099.1:555     |
| <b>C14orf166</b> | 0.112  | 0.0212 | 0.0707 | 0.154  | 0.00185 | 0.0695 | NM_016039.2:210     |
| <b>CD44</b>      | 0.713  | 0.135  | 0.447  | 0.978  | 0.00189 | 0.0696 | NM_001001392.1:429  |
| <b>PRKCD</b>     | 0.839  | 0.161  | 0.523  | 1.15   | 0.00199 | 0.0706 | NM_006254.3:2165    |
| <b>PSMB7</b>     | 0.306  | 0.0589 | 0.191  | 0.422  | 0.00202 | 0.0706 | NM_002799.2:420     |
| <b>EGR1</b>      | 1.83   | 0.356  | 1.14   | 2.53   | 0.00211 | 0.0706 | NM_001964.2:1505    |
| <b>STAT1</b>     | 0.745  | 0.145  | 0.461  | 1.03   | 0.00214 | 0.0706 | NM_007315.2:205     |
| <b>FYN</b>       | 1.23   | 0.238  | 0.758  | 1.69   | 0.00214 | 0.0706 | NM_002037.3:765     |
| <b>NFKBIA</b>    | 0.946  | 0.187  | 0.579  | 1.31   | 0.00232 | 0.0746 | NM_020529.1:945     |
| <b>RELB</b>      | 0.968  | 0.194  | 0.588  | 1.35   | 0.00247 | 0.0746 | NM_006509.2:250     |
| <b>ILF3</b>      | -0.308 | 0.0618 | -0.429 | -0.187 | 0.00249 | 0.0746 | NM_001137673.1:730  |
| <b>CD164</b>     | 0.545  | 0.11   | 0.329  | 0.761  | 0.00258 | 0.0746 | NM_006016.4:2575    |
| <b>CASP3</b>     | 0.422  | 0.0853 | 0.254  | 0.589  | 0.0026  | 0.0746 | NM_032991.2:685     |
| <b>STAT3</b>     | 0.737  | 0.149  | 0.444  | 1.03   | 0.00263 | 0.0746 | NM_139276.2:4535    |
| <b>SMAD3</b>     | 0.628  | 0.128  | 0.377  | 0.88   | 0.00272 | 0.0746 | NM_005902.3:4220    |
| <b>CSF1</b>      | 1.29   | 0.264  | 0.773  | 1.81   | 0.00273 | 0.0746 | NM_000757.4:823     |
| <b>MALT1</b>     | 0.728  | 0.149  | 0.436  | 1.02   | 0.00276 | 0.0746 | NM_006785.2:909     |
| <b>STAT4</b>     | 1.17   | 0.239  | 0.7    | 1.64   | 0.00276 | 0.0746 | NM_003151.2:789     |
| <b>IFNAR2</b>    | 1.13   | 0.232  | 0.675  | 1.58   | 0.00278 | 0.0746 | NM_000874.3:631     |
| <b>TNFSF15</b>   | 1.58   | 0.332  | 0.927  | 2.23   | 0.00314 | 0.0829 | NM_001204344.1:2338 |
| <b>PECAM1</b>    | 0.866  | 0.184  | 0.505  | 1.23   | 0.00332 | 0.0855 | NM_000442.3:1365    |
| <b>CD58</b>      | 0.606  | 0.129  | 0.353  | 0.86   | 0.00338 | 0.0855 | NM_001779.2:478     |
| <b>RELA</b>      | 0.714  | 0.153  | 0.415  | 1.01   | 0.00341 | 0.0855 | NM_021975.2:360     |
| <b>LTB4R2</b>    | -1.04  | 0.222  | -1.47  | -0.6   | 0.00346 | 0.0855 | NM_019839.4:1250    |
| <b>LITAF</b>     | 0.734  | 0.159  | 0.421  | 1.05   | 0.00368 | 0.0895 | NM_004862.3:1000    |
| <b>HLA-DMA</b>   | 1.03   | 0.225  | 0.587  | 1.47   | 0.00384 | 0.0919 | NM_006120.3:380     |
| <b>TRAF6</b>     | 0.659  | 0.146  | 0.373  | 0.945  | 0.00404 | 0.0954 | NM_145803.1:1839    |
| <b>CCL20</b>     | 1.79   | 0.399  | 1.000  | 2.57   | 0.0042  | 0.0977 | NM_004591.1:35      |

## SUPPLEMENTARY FIGURES

**A**

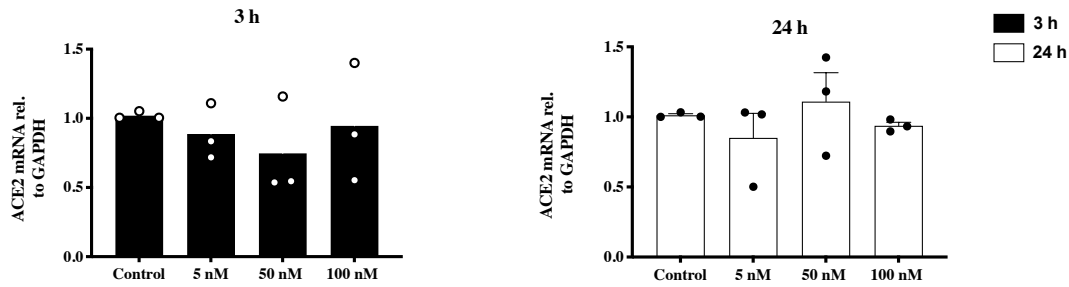

**B**

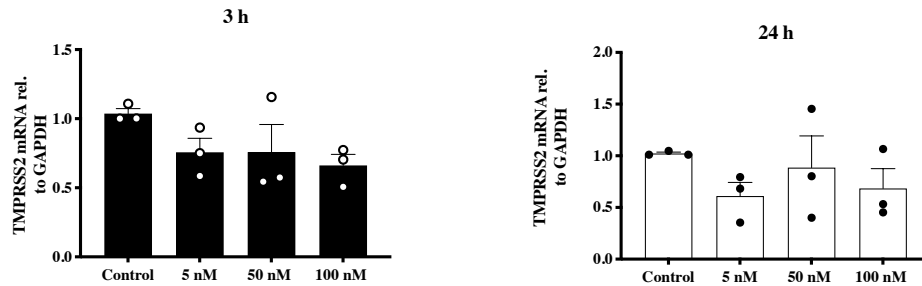

**C**

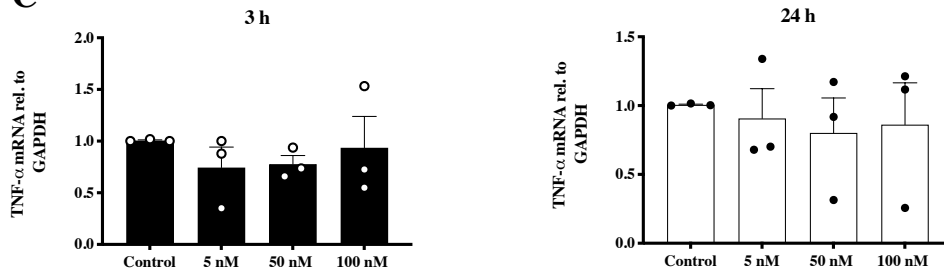

**D**

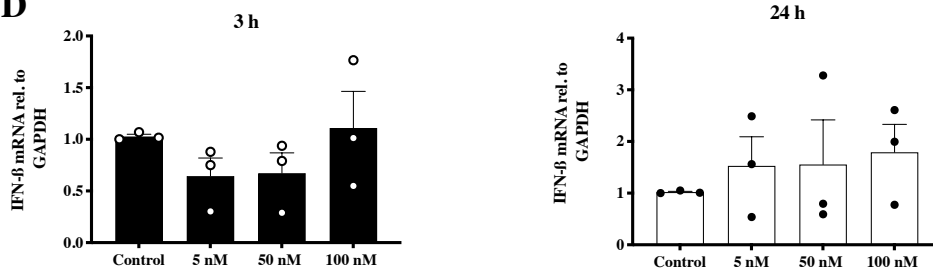

**Supplementary Figure 1. SARS-CoV-2 S-protein 1 (SP1) effect on human bronchial epithelial cells from asthmatic donors.** Dose response (5-100 nM) mRNA expression of the SARS-CoV-2 receptor ACE2 (A), the host protease TMPRSS2 (B), the proinflammatory cytokine TNF- $\alpha$  (C), and the type I interferon IFN- $\beta$  (D) after 3h (left) and 24h (right) stimulation with SP1. N = 3.

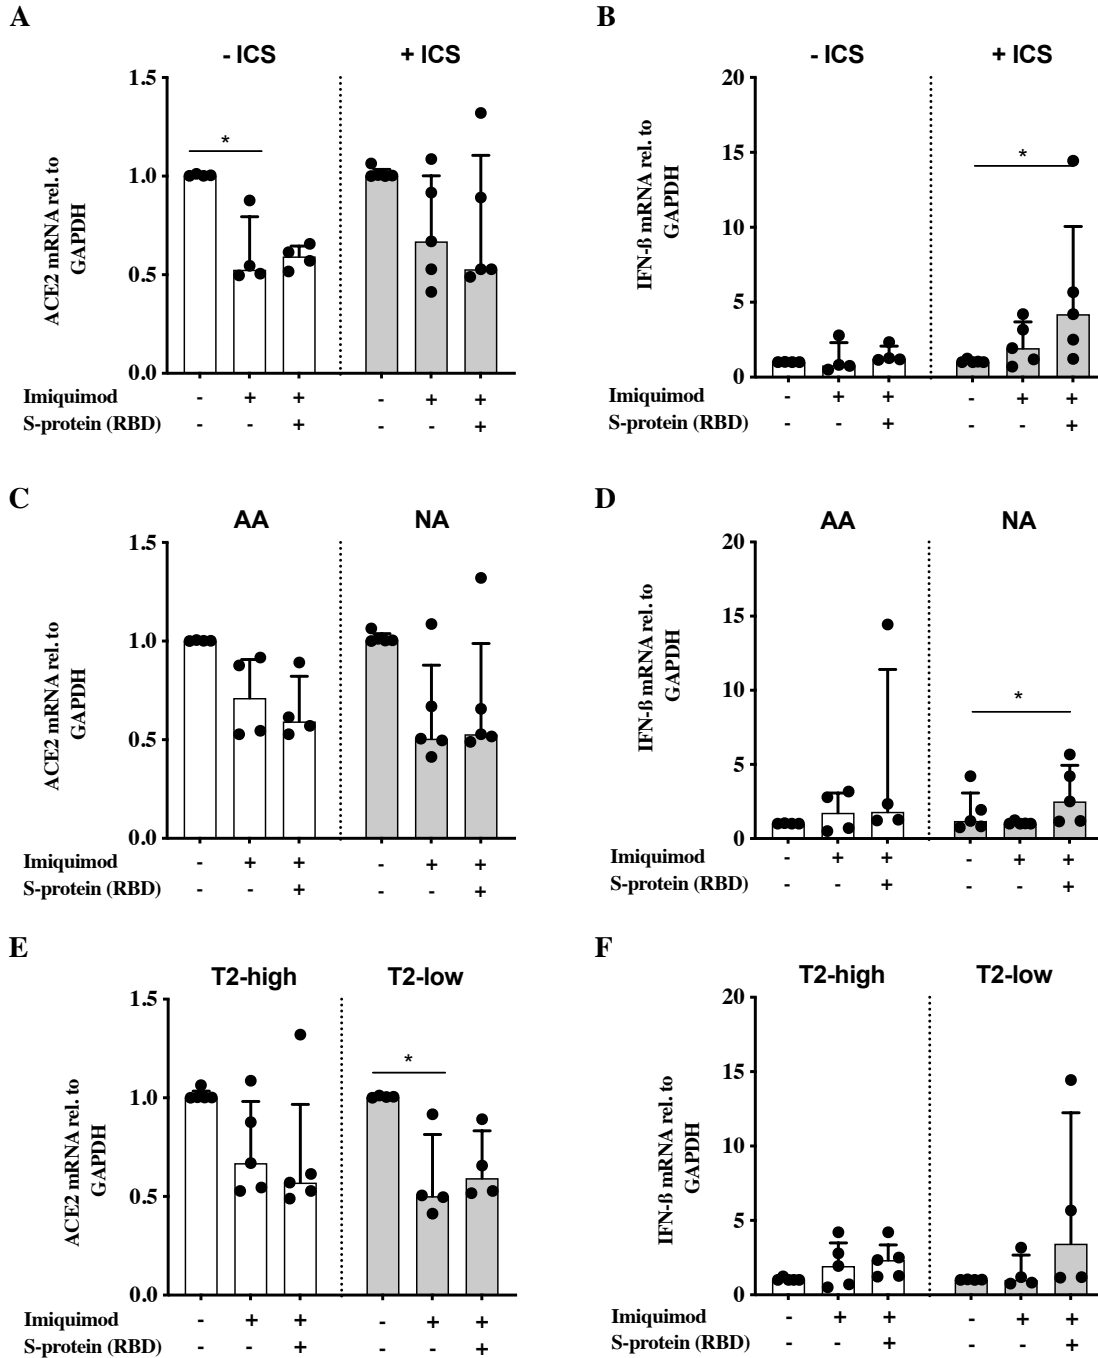

**Supplementary Figure 2. Imiquimod trend to decrease the expression of ACE2 receptor and trend to increase IFN- $\beta$  response independently of asthma phenotype.** mRNA expression of ACE2 (A) and IFN- $\beta$  (B) in HBECs from patients with asthma (cohort 2) treated (N = 5) or not (N = 4) with inhaled corticosteroids (ICS) in response to imiquimod treatment alone or in combination with SP1. mRNA expression of ACE2 (C) and IFN- $\beta$  (D) in HBECs from patients with allergic (AA; N = 4) or non-allergic asthma (NA; N = 5) phenotypes in response to imiquimod treatment alone or in combination with SP1. mRNA expression of ACE2 (E) and IFN- $\beta$  (F) in HBECs from patients with T2-high (N = 5) or T2-low (N = 4) phenotypes in response to imiquimod treatment alone or in combination with SP1. \*  $p < 0.05$ , Friedman test followed by Dunn's multiple comparison test.

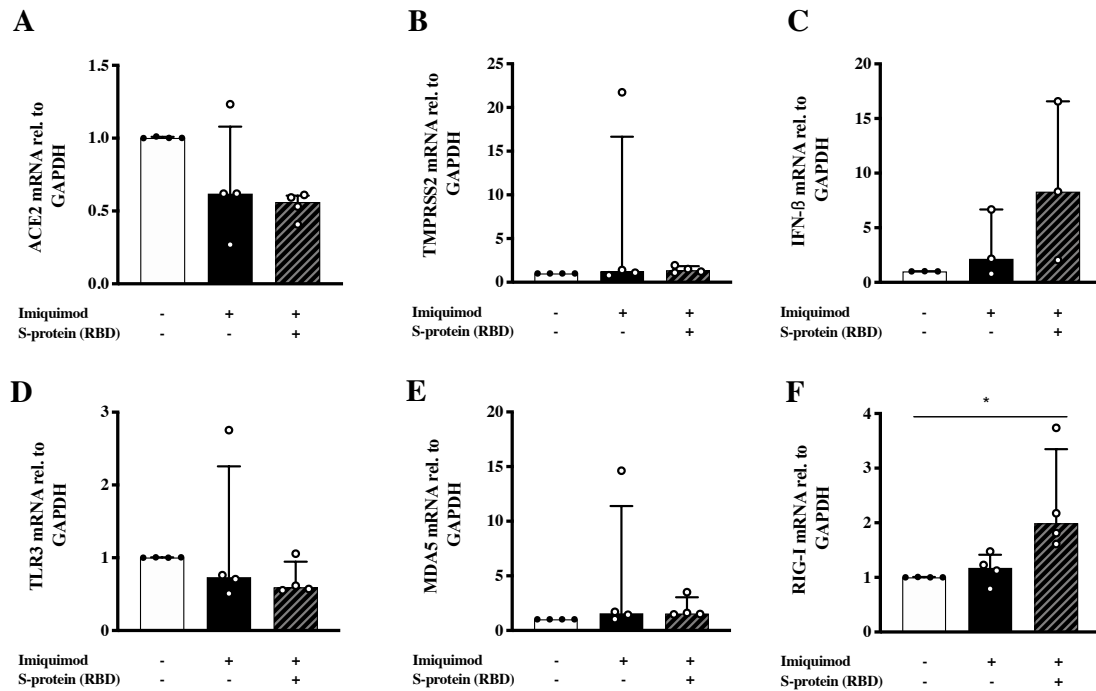

**Supplementary Figure 3. S-protein 1 (SP1) from SARS-CoV-2 in combination with imiquimod trend to decrease the expression of ACE2 receptor and increase the anti-viral response in human bronchial epithelial cells (HBECs) from healthy subjects. mRNA expression of ACE2 (A), TMPRSS2 (B), IFN-β (C), and the pattern recognition receptors TLR3 (D), MDA5 (E), and RIG-I (F) in HBECs in response to imiquimod treatment alone (black bars) or in combination with SP1 (striped bars). \* p < 0.05, Friedman test followed by Dunn's multiple comparison test. N = 4.**

**A**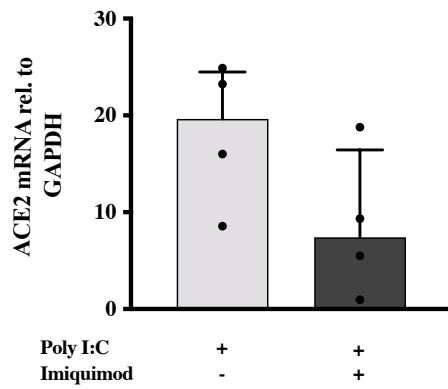**B**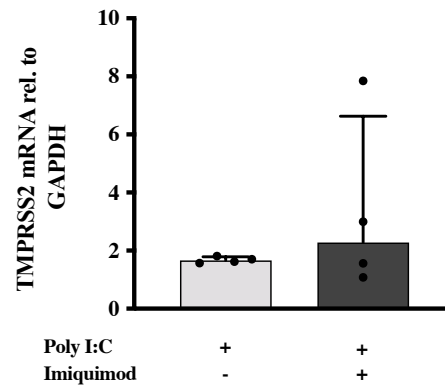

**Supplementary Figure 4. Imiquimod trends to decrease the poly(I:C)-induced expression of ACE2 receptor, but not TMPRSS2 on human bronchial epithelial cells (HBECs) from healthy subjects.** Effect of imiquimod treatment in the poly(I:C) induced ACE2 (A) and TMPRSS2 (B) expression in HBECs from healthy subjects (N = 4).

**A**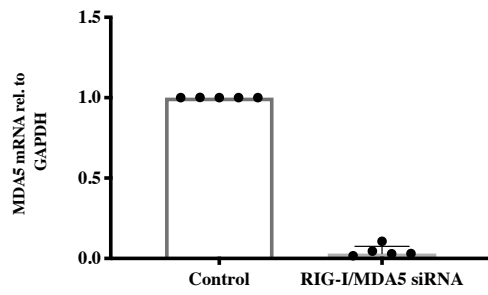**B**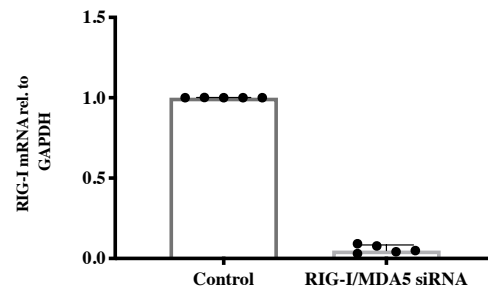

**Supplementary Figure 5. siRNA knock-down of MDA5 and RIG-I mRNA.** MDA5 (A) and RIG-I (B) mRNA expression in HBECs relative to control cells after siRNA-mediated downmodulation of MDA5 and RIG-I. N = 5.

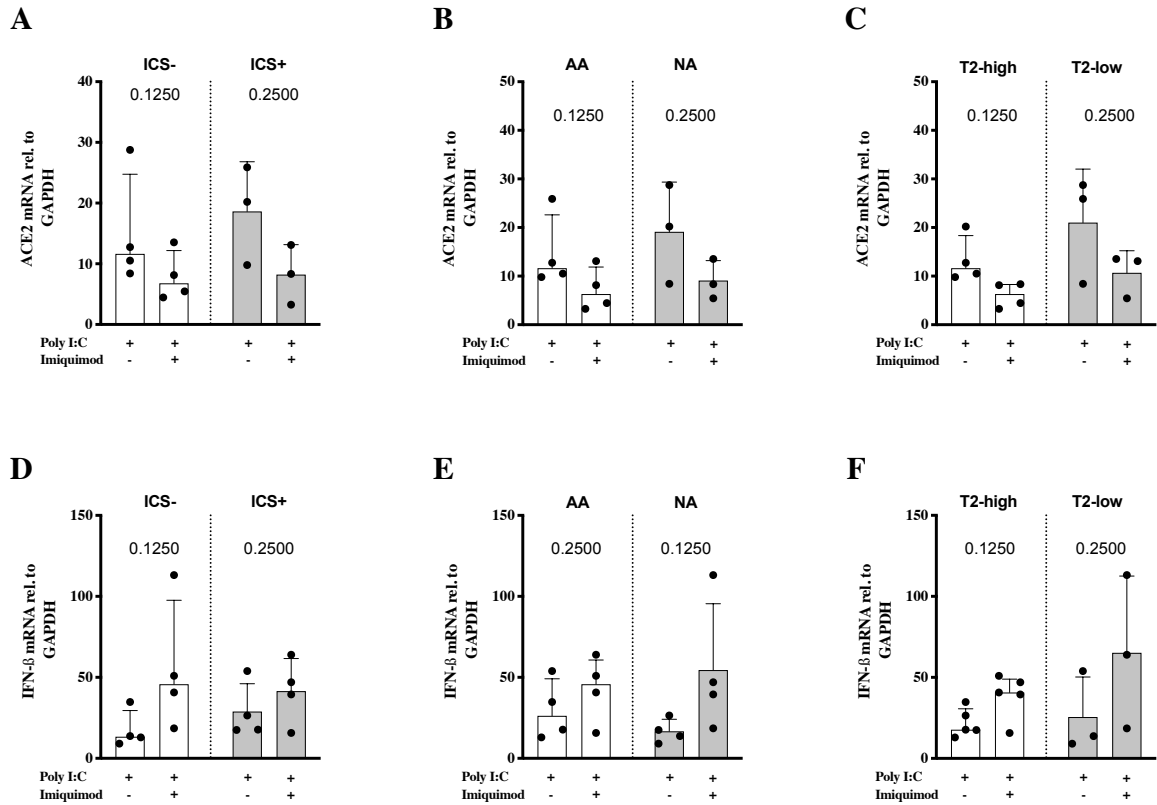

**Supplementary Figure 6. Imiquimod trend to decrease the poly(I:C)-induced expression of ACE2 receptor, whereas trend to increase the poly(I:C)-induced IFN-β response independently of asthma phenotype.** (A) mRNA expression of ACE2 after poly(I:C) stimulation of HBECs from patients with asthma (cohort 2) treated (N = 3) or not (N = 4) with inhaled corticosteroids (ICS) in response to imiquimod treatment. (B-C) mRNA expression of ACE2 after poly(I:C) stimulation of HBECs from patients with allergic (AA; N = 4) / non-allergic asthma (NA; N = 4) (B) or T2-high (N = 4) / T2-low (N = 3) asthma (C) in response to imiquimod treatment. (D) mRNA expression of IFN-β after poly(I:C) stimulation of HBECs from patients with asthma treated or not with ICS in response to imiquimod treatment. (E-F) mRNA expression of IFN-β after poly(I:C) stimulation of HBECs from patients with AA / NA asthma (B) or T2-high / T2-low asthma (C) in response to imiquimod treatment. Number on the graph represent p-values (Wilcoxon test).
